# Supplementary material for: Perceptions regarding antimicrobial use and resistance among adult hospital patients in Saudi Arabian Ministry of Health (MOH) hospitals
Source: PubMed Central journal article supplement — Saudi Pharm J. 2020 Oct 29;28(12):1648–54. doi: 10.1016/j.jsps.2020.10.011 (PMC7783113; doi:10.1016/j.jsps.2020.10.011), 2020-10-29
Supplement: mmc1.pdf [file mmc1.pdf]

درجة معرفة و وعي المرضى في المستشفيات السعودية بخصوص استخدام المضادات الحيوية و مقاومتها.

الهدف من هذا الإستبيان هو تقييم معرفة و وعي المرضى في المستشفيات السعودية بخصوص استخدام المضادات الحيوية و مقاومتها. الرجاء عدم التعريف بنفسك أو أي شخص اخر.

إكمال و إعادة هذا الإستبيان يعتبر موافقة منكم على المشاركة في هذه الدراسة و على استخدام ردودكم في هذا المشروع البحثي.

من المتوقع أن يستغرق إكمال هذا الإستبيان ما يقارب ١٠ دقائق.

### الجزء الاول

١. الجنس؟  ذكر  أنثى

٢. ما هي الفئة العمرية الخاصة بك؟

٢١ - ٣٠ سنة

٣١ - ٤٠ سنة

٤١ - ٥٠ سنة

٥١ - ٦٠ سنة

٦١ - ٧٠ سنة

٧١ - ٨٠ سنة

٣. ما هو مستواك التعليمي؟

أقل من الشهادة الثانوية

الشهادة الثانوية

البكالوريوس

الماجستير

الدكتوراة

## الجزء الثاني

١. الحصول على المضادات الحيوية: الرجاء قراءة كل عبارة بخصوص الحصول على المضادات الحيوية وإختيار: أوافق / لا أوافق / لا أعلم.

| أوافق                 | لا أوافق              | لا أعلم               |
|-----------------------|-----------------------|-----------------------|
| <input type="radio"/> | <input type="radio"/> | <input type="radio"/> |
| <input type="radio"/> | <input type="radio"/> | <input type="radio"/> |
| <input type="radio"/> | <input type="radio"/> | <input type="radio"/> |
| <input type="radio"/> | <input type="radio"/> | <input type="radio"/> |

٢. تأثير المضادات الحيوية: الرجاء قراءة كل عبارة بخصوص تأثير المضادات الحيوية وإختيار: أوافق / لا أوافق / لا أعلم.

| أوافق                 | لا أوافق              | لا أعلم               |
|-----------------------|-----------------------|-----------------------|
| <input type="radio"/> | <input type="radio"/> | <input type="radio"/> |
| <input type="radio"/> | <input type="radio"/> | <input type="radio"/> |
| <input type="radio"/> | <input type="radio"/> | <input type="radio"/> |
| <input type="radio"/> | <input type="radio"/> | <input type="radio"/> |
| <input type="radio"/> | <input type="radio"/> | <input type="radio"/> |
| <input type="radio"/> | <input type="radio"/> | <input type="radio"/> |

٣. مقاومة المضادات الحيوية (قدرة الكائن الحي الدقيق المعروف بالبكتيريا على تحمل مفعول المضاد الحيوي مما يؤدي على عدم فعالية المضاد الحيوي في جسم الإنسان): الرجاء قراءة كل عبارة بخصوص مقاومة المضادات الحيوية وإختيار: أوافق / لا أوافق / لا أعلم.

| أوافق                 | لا أوافق              | لا أعلم               |
|-----------------------|-----------------------|-----------------------|
| <input type="radio"/> | <input type="radio"/> | <input type="radio"/> |
| <input type="radio"/> | <input type="radio"/> | <input type="radio"/> |
| <input type="radio"/> | <input type="radio"/> | <input type="radio"/> |
| <input type="radio"/> | <input type="radio"/> | <input type="radio"/> |
| <input type="radio"/> | <input type="radio"/> | <input type="radio"/> |
| <input type="radio"/> | <input type="radio"/> | <input type="radio"/> |

٤. الرجاء قراءة كل عبارة بخصوص عادات الأطباء و علاقة المريض و الطبيب وإختيار: أوافق / لا أوافق / لا أعلم.

| أوافق                 | لا أوافق              | لا أعلم               |
|-----------------------|-----------------------|-----------------------|
| <input type="radio"/> | <input type="radio"/> | <input type="radio"/> |
| <input type="radio"/> | <input type="radio"/> | <input type="radio"/> |
| <input type="radio"/> | <input type="radio"/> | <input type="radio"/> |
| <input type="radio"/> | <input type="radio"/> | <input type="radio"/> |
| <input type="radio"/> | <input type="radio"/> | <input type="radio"/> |
| <input type="radio"/> | <input type="radio"/> | <input type="radio"/> |

٥. الرجاء قراءة كل عبارة بخصوص إستخدام المريض للمضادات الحيوية خلال فترة التنويم في المستشفيات و إختيار: أوافق / لا أوافق / لا أعلم.

| أوافق                 | لا أوافق              | لا أعلم               |
|-----------------------|-----------------------|-----------------------|
| <input type="radio"/> | <input type="radio"/> | <input type="radio"/> |
| <input type="radio"/> | <input type="radio"/> | <input type="radio"/> |
| <input type="radio"/> | <input type="radio"/> | <input type="radio"/> |
| <input type="radio"/> | <input type="radio"/> | <input type="radio"/> |
| <input type="radio"/> | <input type="radio"/> | <input type="radio"/> |

شكرا لإكمالك هذا الإستبيان.
