# Supplementary material for: Perceptions regarding antimicrobial use and resistance among adult hospital patients in Saudi Arabian Ministry of Health (MOH) hospitals
Source: PubMed Central journal article supplement — Saudi Pharm J. 2020 Oct 29;28(12):1648–54. doi: 10.1016/j.jsps.2020.10.011 (PMC7783113; doi:10.1016/j.jsps.2020.10.011), 2020-10-29
Supplement: mmc2.pdf [file mmc2.pdf]

**Patient's knowledge and awareness regarding antimicrobial use and resistance in Saudi hospitals.**

The aim of this survey is to evaluate the knowledge and awareness regarding antimicrobial use and resistance among hospital patients in Saudi hospitals. Please do not identify yourself or other individuals.

By completing and returning this questionnaire you are giving your consent to participate in the study and for your responses to be used for the purpose of this research project.

The questionnaire should take **around (10) minutes to complete.**

**Part A**

**1. Gender?**                       Male                       Female

**2. What is your age group?**

- 21-30 years
- 31-40 years
- 41-50 years
- 51-60 years
- 61-70 years
- 71-80 years

**Q3. What level of education have you achieved?**

- Less than high school
- High school
- Bachelor
- Master
- PhD

**Part B**

**1. Access to antibiotics:** Please read carefully each statement regarding access to antibiotics and tick, Agree, Don't agree or Don't know.

|                                                                                                                 | <b>Agree</b>          | <b>Don't agree</b>    | <b>Don't know</b>     |
|-----------------------------------------------------------------------------------------------------------------|-----------------------|-----------------------|-----------------------|
| 1. Left-over antibiotics are good to keep at home in case they might be needed later on.                        | <input type="radio"/> | <input type="radio"/> | <input type="radio"/> |
| 2. If a family member is sick, I will give him/her my antibiotic.                                               | <input type="radio"/> | <input type="radio"/> | <input type="radio"/> |
| 3. It is good to be able to get antibiotics from relatives, friends or pharmacy without having to see a doctor. | <input type="radio"/> | <input type="radio"/> | <input type="radio"/> |
| 4. I will give my antibiotic to a family member if needed.                                                      | <input type="radio"/> | <input type="radio"/> | <input type="radio"/> |

**2. Effect of antibiotics:** Please read carefully each statement regarding effect of antibiotics and tick, Agree, Don't agree or Don't know.

|                                                                                                                    | <b>Agree</b>          | <b>Don't agree</b>    | <b>Don't know</b>     |
|--------------------------------------------------------------------------------------------------------------------|-----------------------|-----------------------|-----------------------|
| 1. When I get cold, I will take antibiotics to help me get better quickly.                                         | <input type="radio"/> | <input type="radio"/> | <input type="radio"/> |
| 2. If I feel better after a few days, I will stop taking my antibiotics before completing the course of treatment. | <input type="radio"/> | <input type="radio"/> | <input type="radio"/> |
| 3. Antibiotics are indicated to relieve pain/inflammation.                                                         | <input type="radio"/> | <input type="radio"/> | <input type="radio"/> |
| 4. Antibiotics are used to stop fever.                                                                             | <input type="radio"/> | <input type="radio"/> | <input type="radio"/> |
| 5. Antibiotics are effective against bacteria.                                                                     | <input type="radio"/> | <input type="radio"/> | <input type="radio"/> |
| 6. Antibiotics are effective against viruses.                                                                      | <input type="radio"/> | <input type="radio"/> | <input type="radio"/> |

**3. Antibiotics resistance:** Please read carefully each statement and tick, Agree, Don't agree or Don't know.

|                                                                                                            | <b>Agree</b>          | <b>Don't agree</b>    | <b>Don't know</b>     |
|------------------------------------------------------------------------------------------------------------|-----------------------|-----------------------|-----------------------|
| 1. Antibiotic resistance can be due to using antibiotics when they are not necessary.                      | <input type="radio"/> | <input type="radio"/> | <input type="radio"/> |
| 2. Antibiotic resistance can be due to not completing the full course of antibiotic.                       | <input type="radio"/> | <input type="radio"/> | <input type="radio"/> |
| 3. Antibiotic resistance can be due to using antibiotics without physician prescription (self-medication). | <input type="radio"/> | <input type="radio"/> | <input type="radio"/> |
| 4. Antibiotic resistance can be due to using the same antibiotic with a different brand.                   | <input type="radio"/> | <input type="radio"/> | <input type="radio"/> |
| 5. Antibiotic resistance is a problem in Saudi today.                                                      | <input type="radio"/> | <input type="radio"/> | <input type="radio"/> |
| 6. Antibiotic resistance is a problem in the rest of the world today.                                      | <input type="radio"/> | <input type="radio"/> | <input type="radio"/> |

**4. Doctor's habits and the patient/doctor relationship:** Please read carefully each statement and tick, Agree, Don't agree or Don't know.

|                                                                                                     | <b>Agree</b>          | <b>Don't agree</b>    | <b>Don't know</b>     |
|-----------------------------------------------------------------------------------------------------|-----------------------|-----------------------|-----------------------|
| 1. I trust the doctor decision if she or he decides not to prescribe antibiotics.                   | <input type="radio"/> | <input type="radio"/> | <input type="radio"/> |
| 2. I trust the doctor decision if she or he decides to prescribe antibiotics.                       | <input type="radio"/> | <input type="radio"/> | <input type="radio"/> |
| 3. Doctors often take time to consider carefully whether antibiotics are needed or not.             | <input type="radio"/> | <input type="radio"/> | <input type="radio"/> |
| 4. Doctors often prescribe antibiotics because the patient expects it.                              | <input type="radio"/> | <input type="radio"/> | <input type="radio"/> |
| 5. A doctor who doesn't prescribe antibiotics when the patient thinks s/he should, is a bad doctor. | <input type="radio"/> | <input type="radio"/> | <input type="radio"/> |
| 6. I consult another physician to prescribe antibiotics if my physician disagreed to do so.         | <input type="radio"/> | <input type="radio"/> | <input type="radio"/> |

**5. Patients' use of antibiotics during hospital stay:** Please read carefully each statement and tick, Agree, Don't agree or Don't know

|                                                                           | <b>Agree</b>          | <b>Don't agree</b>    | <b>Don't know</b>     |
|---------------------------------------------------------------------------|-----------------------|-----------------------|-----------------------|
| 1. My doctor/pharmacist told me that I am being treated with antibiotics. | <input type="radio"/> | <input type="radio"/> | <input type="radio"/> |
| 2. I was told about how to take the antibiotic.                           | <input type="radio"/> | <input type="radio"/> | <input type="radio"/> |
| 3. This hospital is strict when it comes to prescribing antibiotics.      | <input type="radio"/> | <input type="radio"/> | <input type="radio"/> |
| 4. This hospital provides information on antibiotic resistance.           | <input type="radio"/> | <input type="radio"/> | <input type="radio"/> |
| 5. My hospital stay improved my awareness of antibiotic resistance.       | <input type="radio"/> | <input type="radio"/> | <input type="radio"/> |

**Thank you for completing this survey.**
